# Supplementary material for: IL-8 Signaling Plays a Critical Role in the Epithelial–Mesenchymal Transition of Human Carcinoma Cells
Source: Oxford University Press journal article supplement (doi:10.1158/0008-5472.can-11-0156), 2011-06-09
Supplement: 00085472can110156-sup-sfig_1.pdf [file 00085472can110156-sup-sfig_1.pdf]

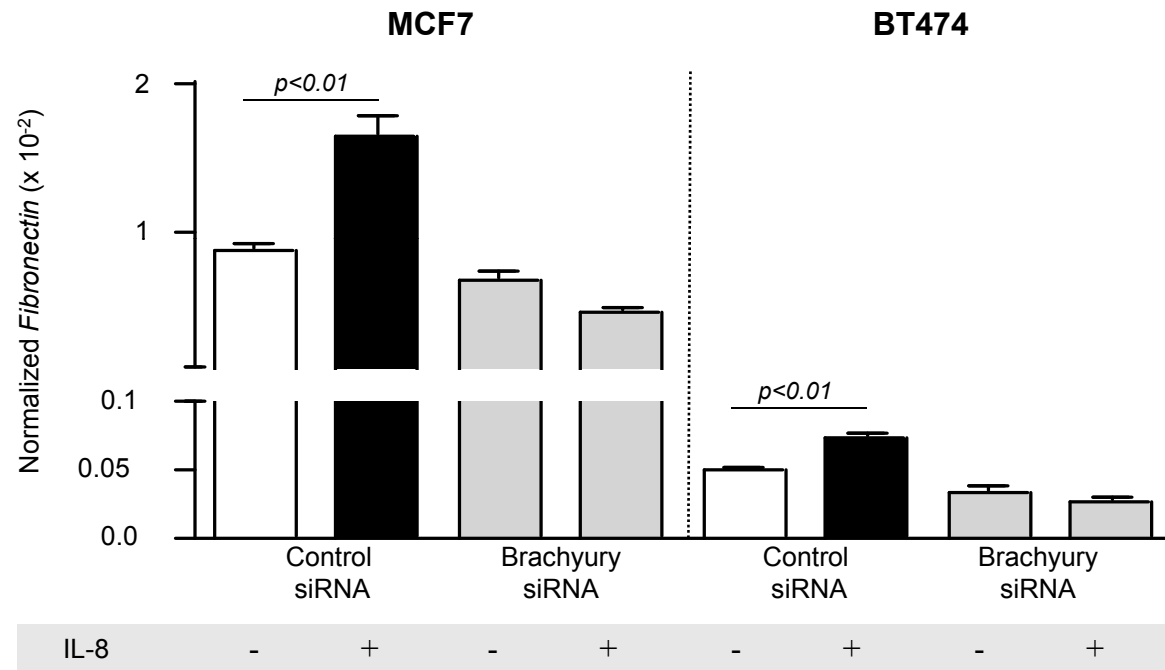

**Supplemental Figure 1.** Real time RT-PCR analysis of *Fibronectin* expression in (A) MCF7 cells and (B) BT474 cells in response to IL-8. Tumor cells were transiently transfected with a control siRNA or siRNA specific for Brachyury.
